# Supplementary material for: The design and development of technology platforms in a developing country healthcare context from an ecosystem perspective
Source: Springer Nature journal article supplement (doi:10.1186/s12911-020-1028-0), 2020-03-12

# Platform Management Tool Pre-use Canvas

## Establish Platform Profile

Determines perspective and approach towards tool

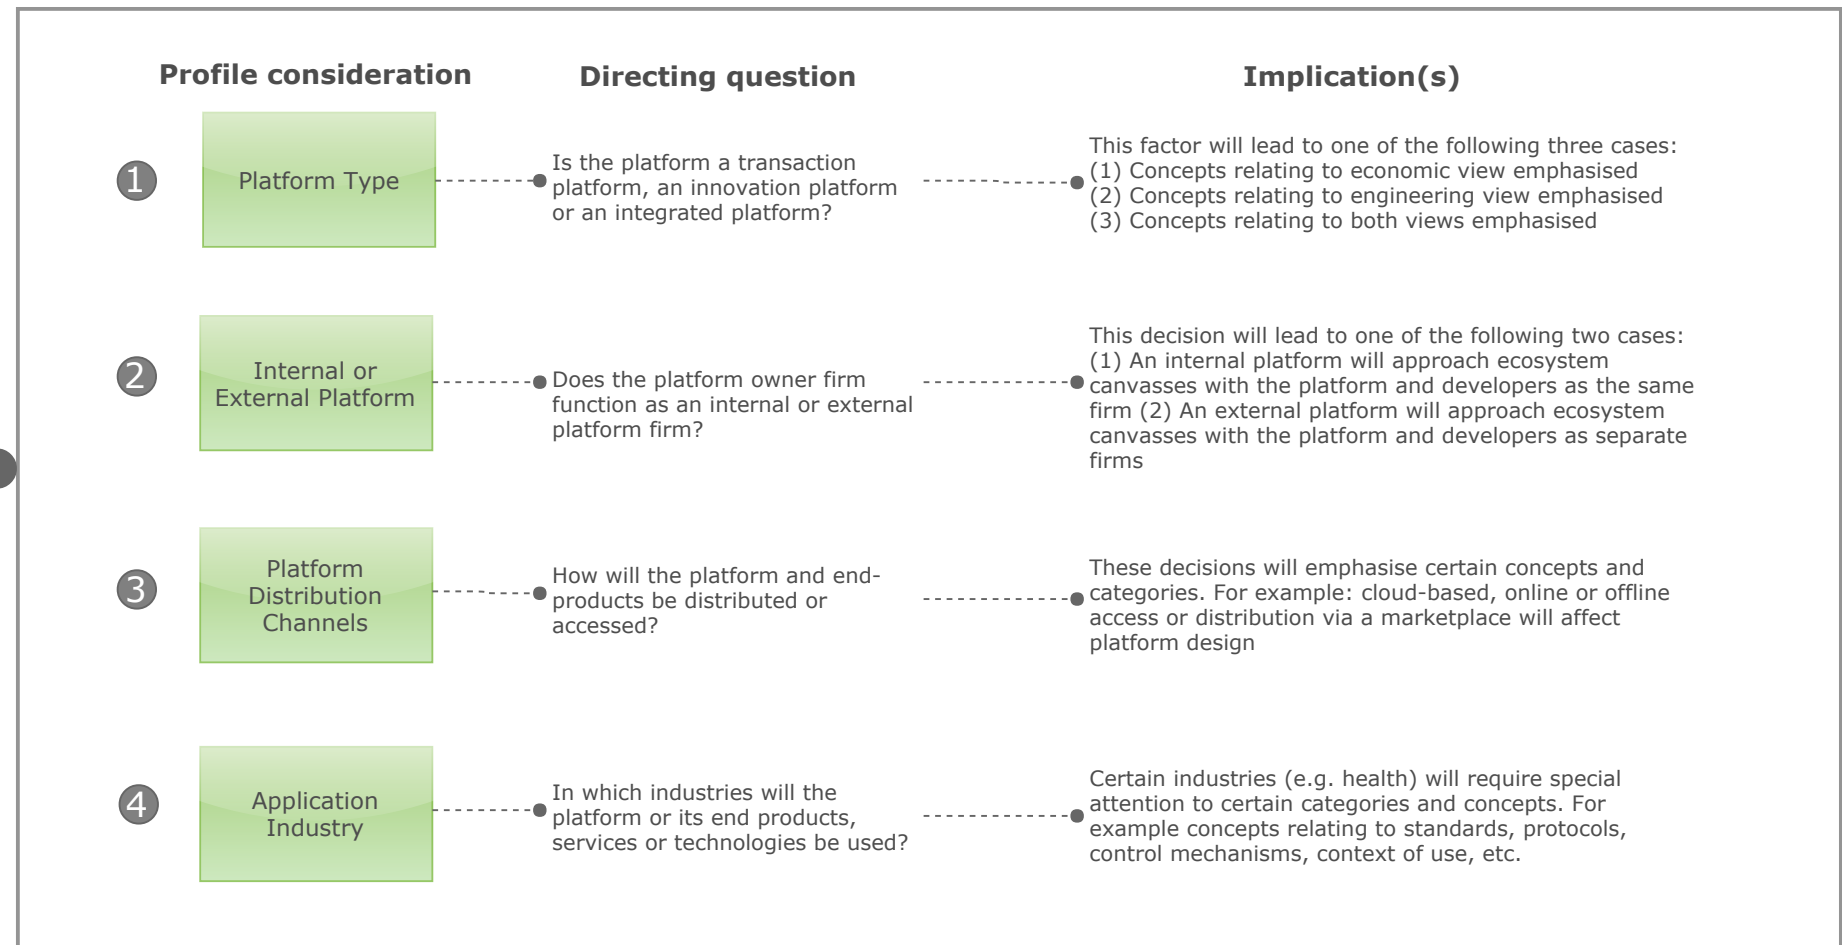

## Tool Overview

Graphical overview of canvasses included in tool

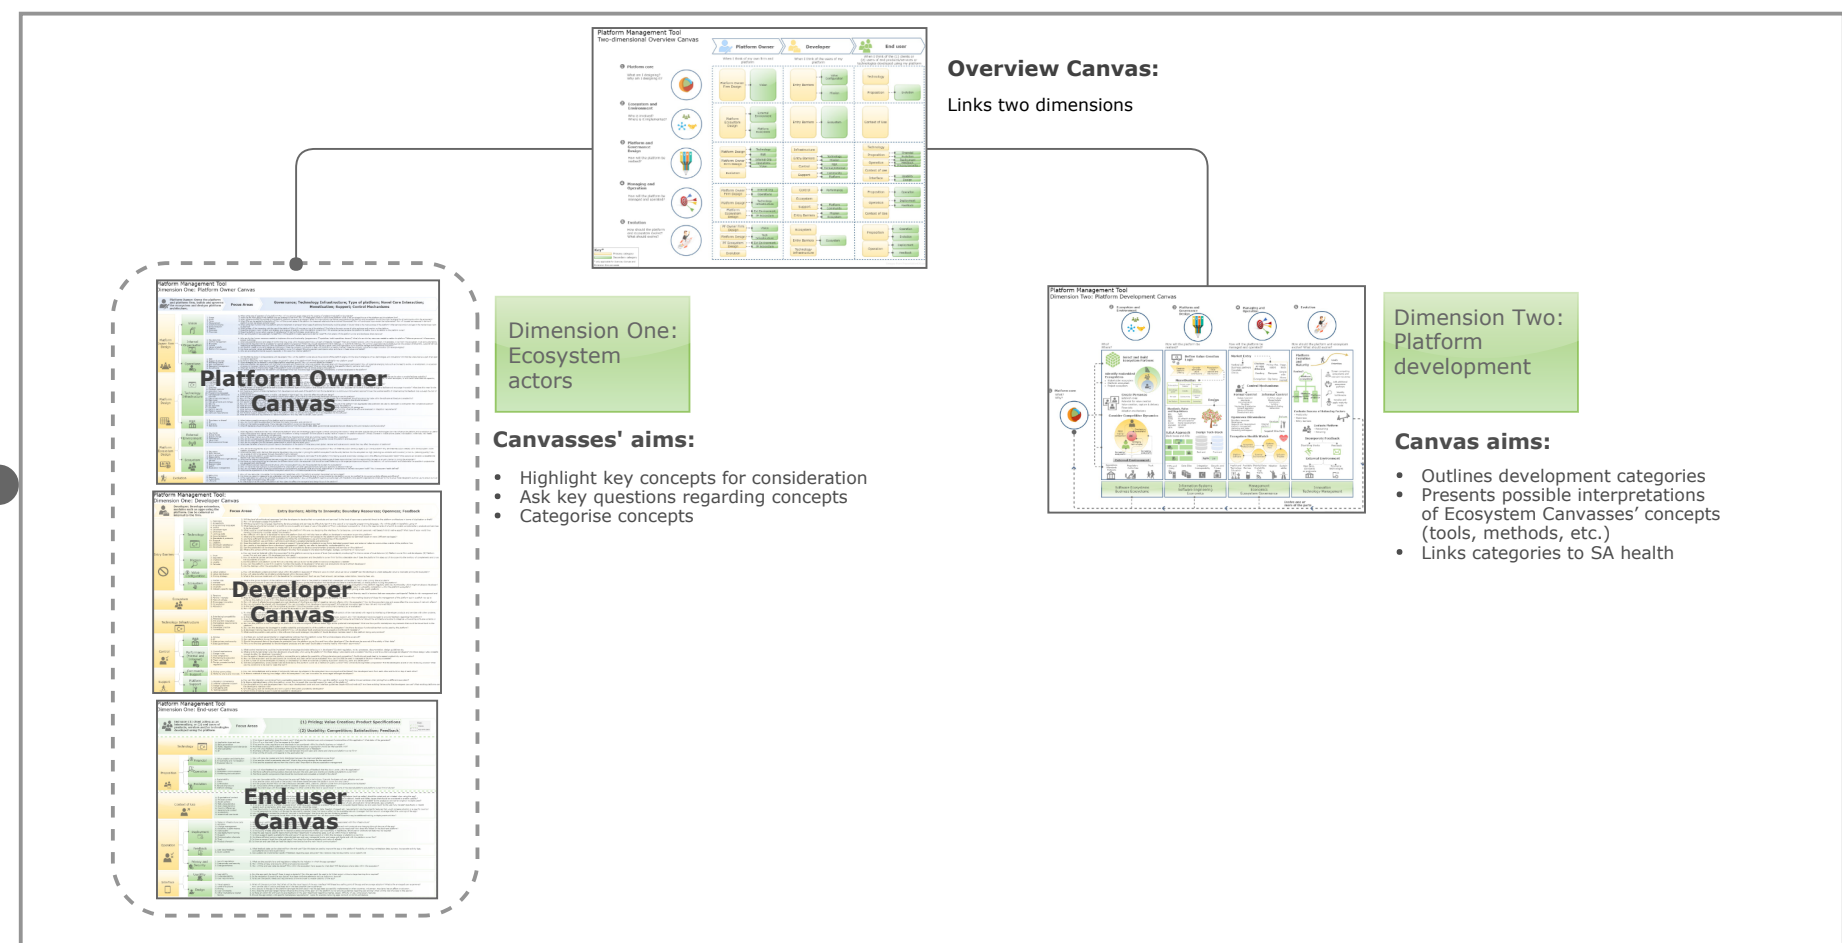

Supplement: MOESM1 [file 17793686]
