# Supplementary material for: The design and development of technology platforms in a developing country healthcare context from an ecosystem perspective
Source: Springer Nature journal article supplement (doi:10.1186/s12911-020-1028-0), 2020-03-12
Supplement: MOESM2 [file 17793686]

# Platform Management Tool

## Two-dimensional Overview Canvas

### 1 Platform core

What am I designing?  
Why am I designing it?

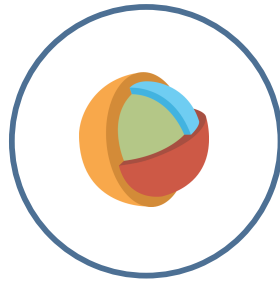

### 2 Ecosystem and Environment

Who is involved?  
Where is it implemented?

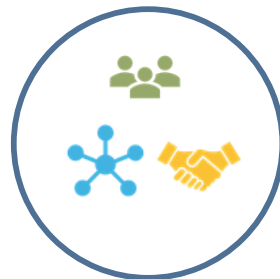

### 3 Platform and Governance Design

How will the platform be realised?

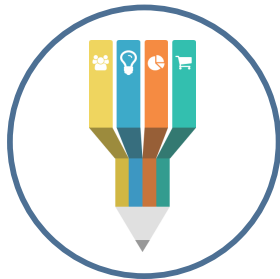

### 4 Managing and Operation

How will the platform be managed and operated?

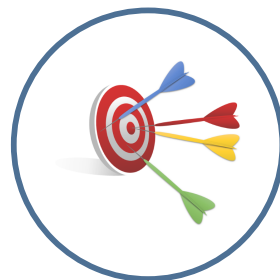

### 5 Evolution

How should the platform and ecosystem evolve?  
What should evolve?

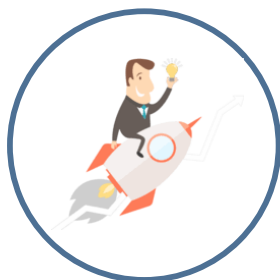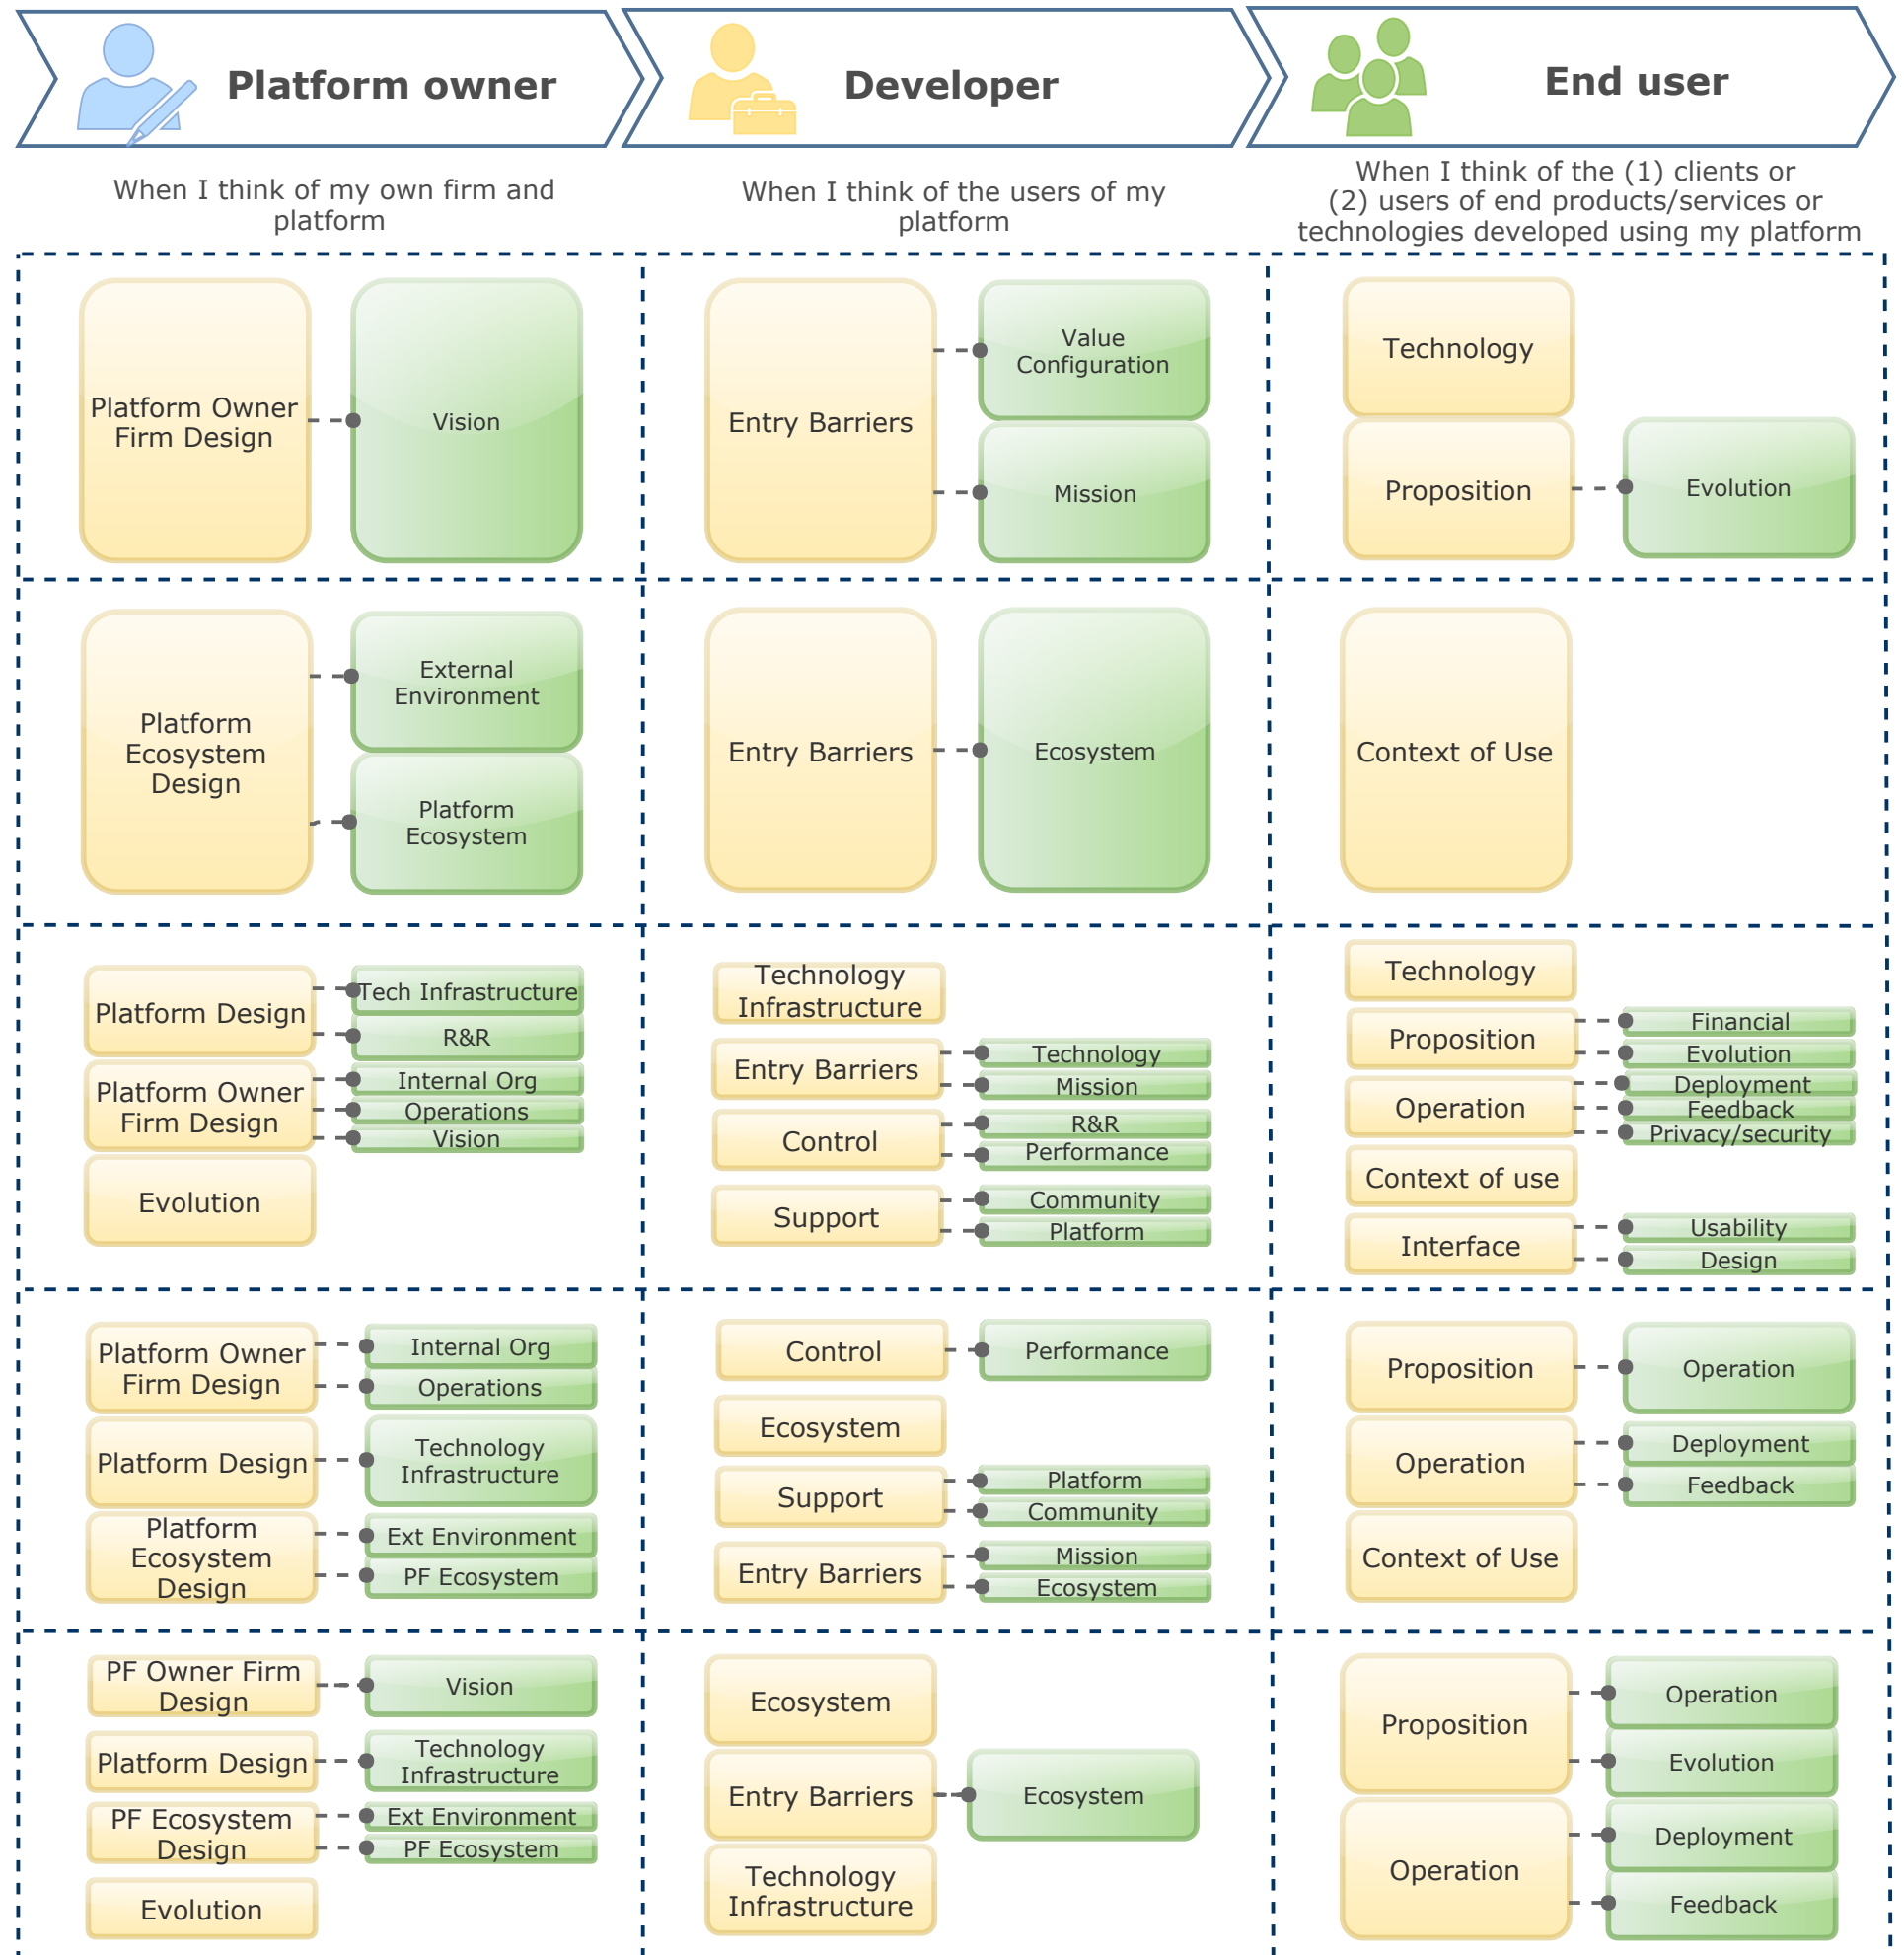

**Key\***

- Primary category
- Secondary category

\* only applicable for Overview Canvas and Dimension One canvasses
