# Supplementary material for: The design and development of technology platforms in a developing country healthcare context from an ecosystem perspective
Source: Springer Nature journal article supplement (doi:10.1186/s12911-020-1028-0), 2020-03-12

# Platform Management Tool

## Dimension One: End-user Canvas

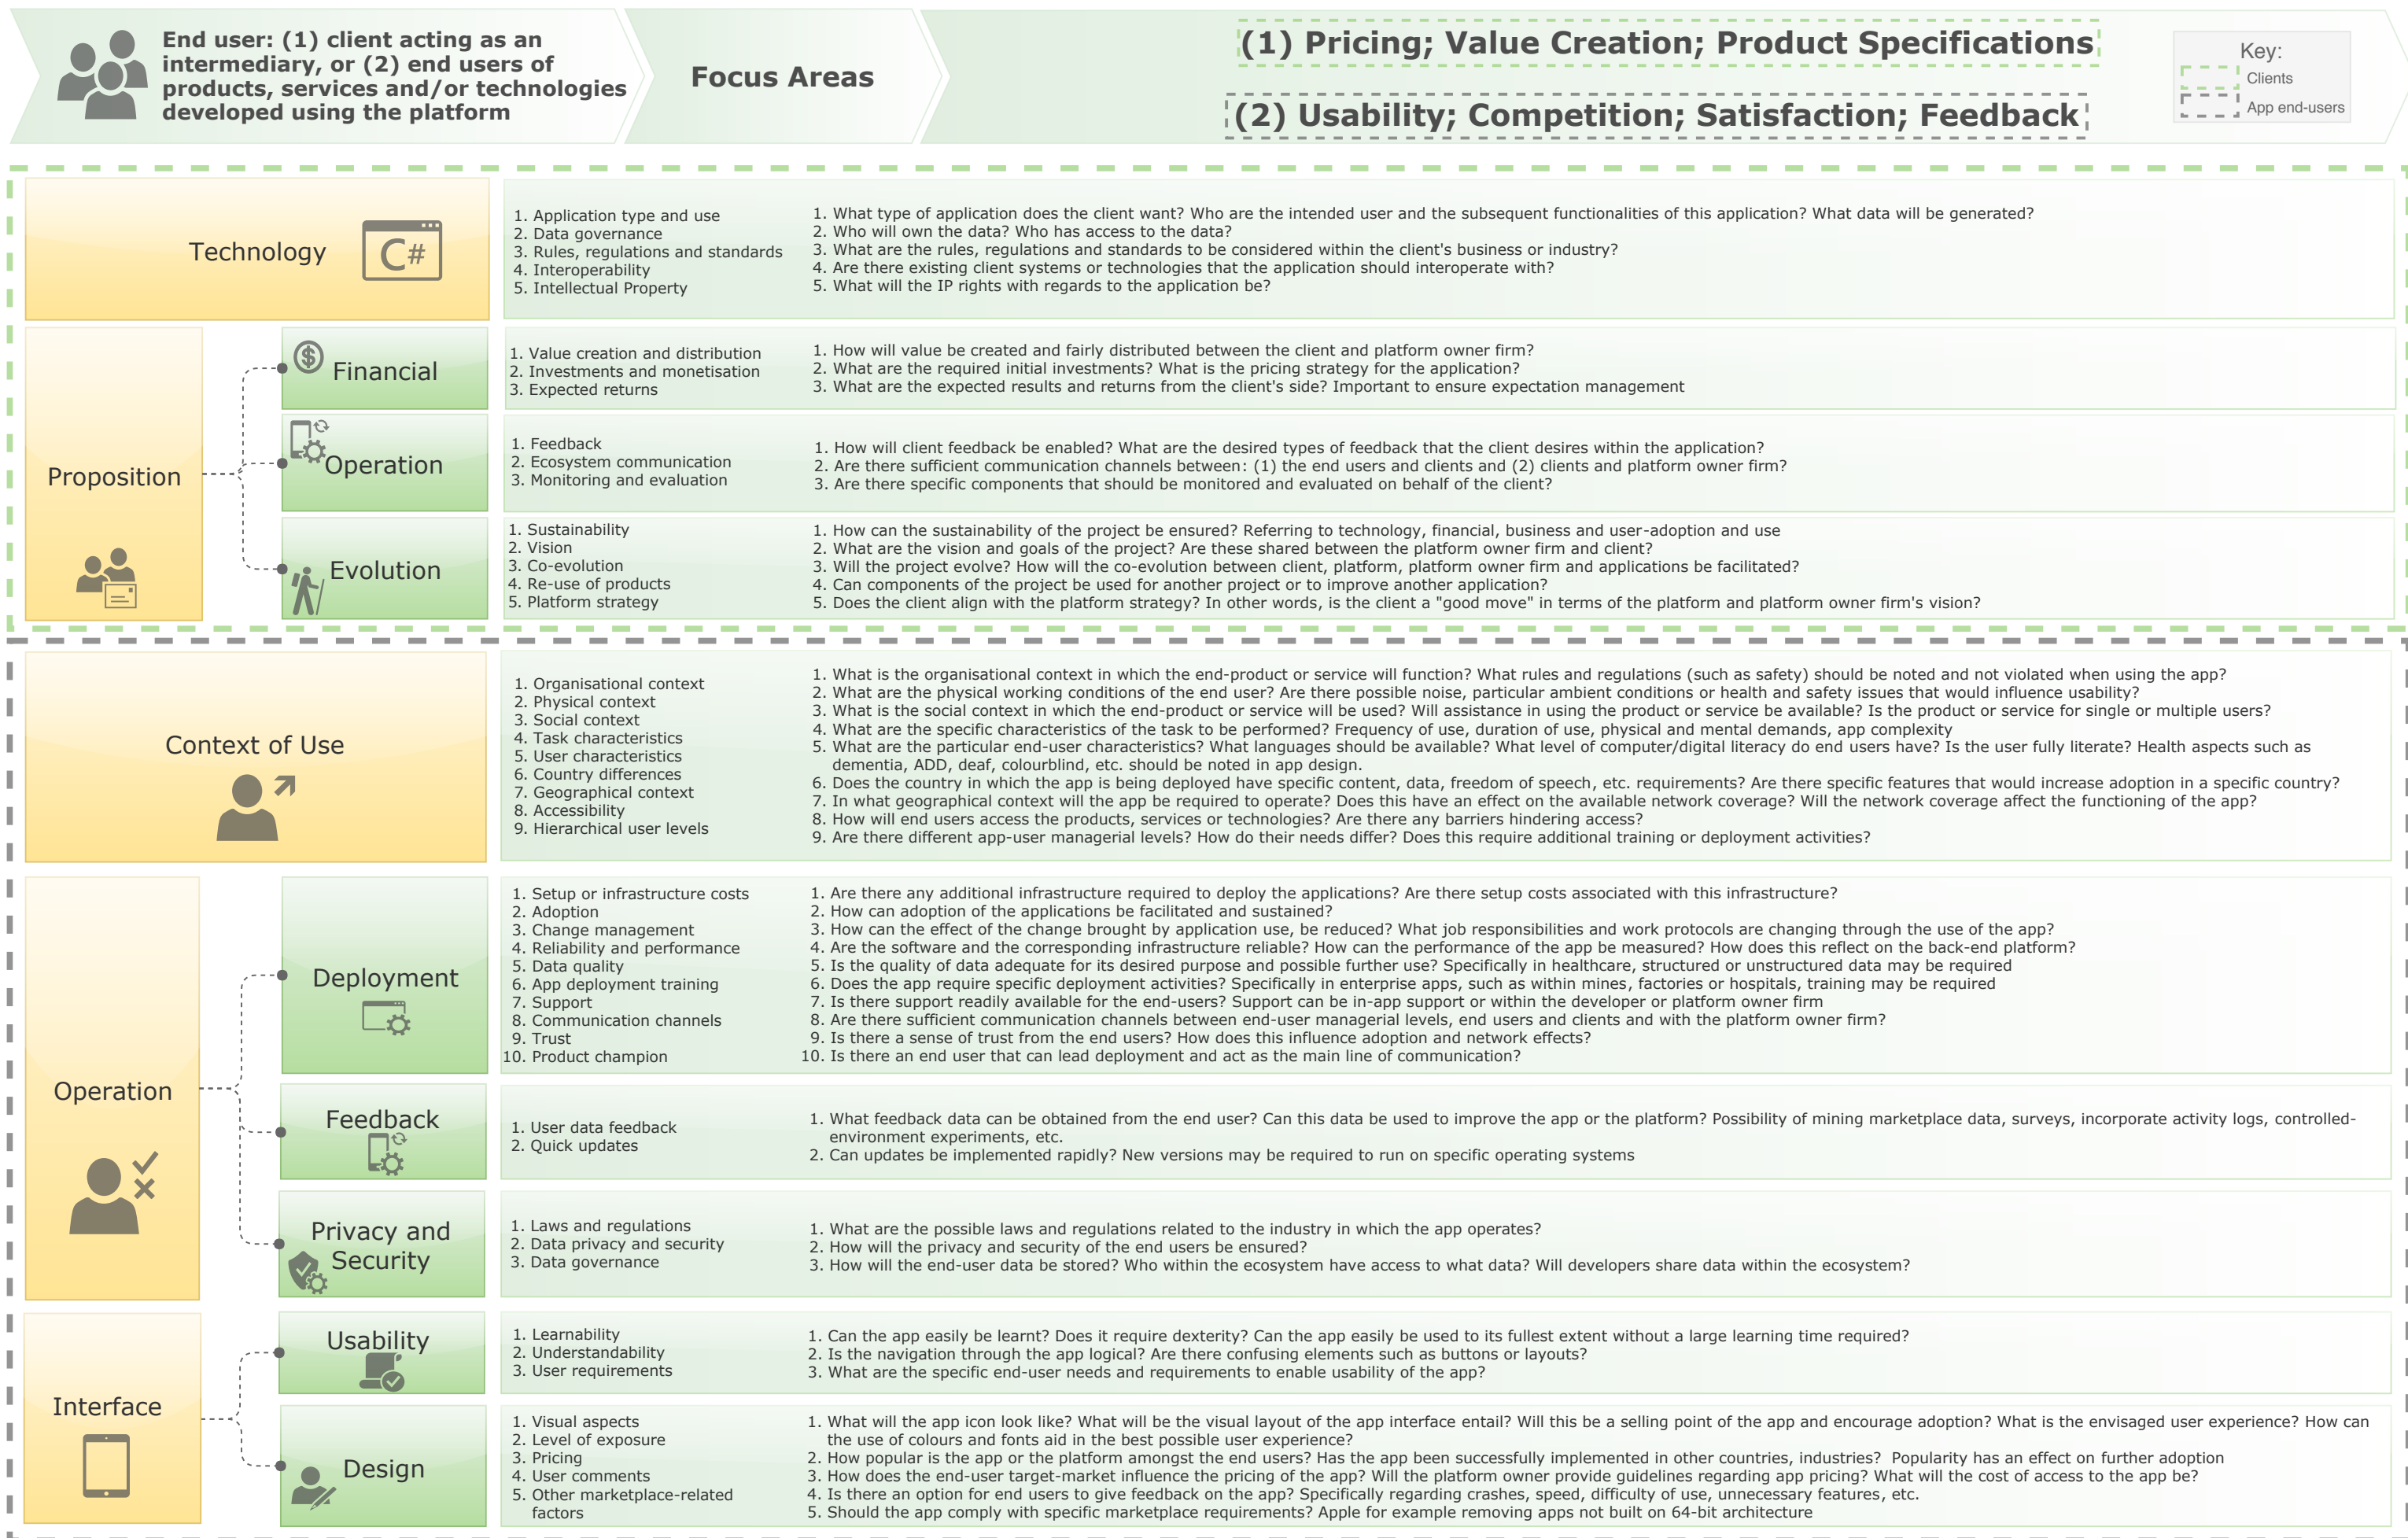

Supplement: MOESM5 [file 17793686]
