# Supplementary material for: The design and development of technology platforms in a developing country healthcare context from an ecosystem perspective
Source: Springer Nature journal article supplement (doi:10.1186/s12911-020-1028-0), 2020-03-12
Supplement: MOESM6 [file 17793686]

# Platform Management Tool

## Dimension Two: Platform Development Canvas

### 2 Ecosystem and Environment

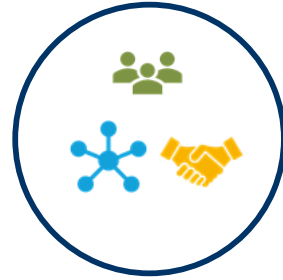

### 3 Platform and Governance Design

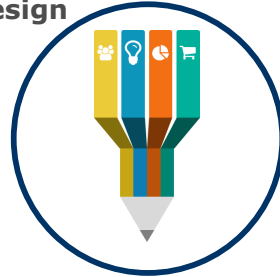

### 4 Managing and Operation

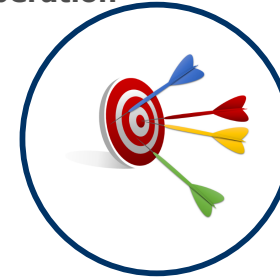

### 5 Evolution

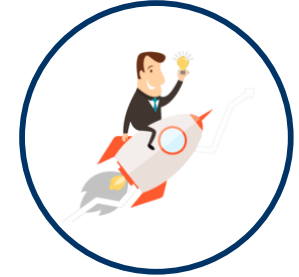

Who?  
Where?

How will the platform be realised?

How will the platform be managed and operated?

How should the platform and ecosystem evolve? What should evolve?

### 1 Platform core

What?  
Why?

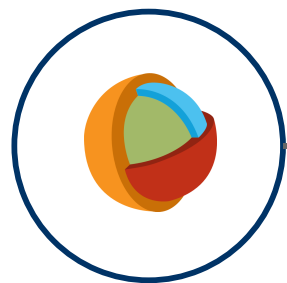

**Select and Build Ecosystem Partners**

**Identify Embedded Ecosystems**

- Stakeholder ecosystem
- Platform ecosystem
- Project ecosystem

**Create Personas**

Establish roles  
Potential for value creation  
Value creation, capture & delivery  
Financials  
Adoption mechanisms

**Consider Competitive Dynamics**

Overlapping functionality  
PECO internal competition  
Emerging technologies  
Competing ecosystems

**External Environment**

Regulations Standards Protocols  
Regulatory Authorities  
Trust

Software Ecosystems  
Business Ecosystems

**Define Value Creation Logic**

Establish platform offering → Consider ecosystem value contributors → Monetisation (Value capture and distribution)

**Monetisation**

|                   |                       |                   |
|-------------------|-----------------------|-------------------|
| Subscription      | Project scope related | Transaction fee   |
| Percentage profit | Credits               | Access - enhanced |
| Per user          | Outsourcing           | Customer base     |
| Per feature       | Sponsorship           | Licensing         |

**Design**

**Standards, Rules and Regulations**

ISO PoPI  
IEEE HISP  
SANS SA eHealth strategy  
HL7 PPD principles for digital development  
ICD10 SA HNSF  
SNOMED SA HIPAA  
SITA

**S.O.A Approach**  
Black boxes and APIs

**Design Tech-Stack**

Back-end Front-end  
Agile ON

EHRs and EMRs Data Silos Integration Interoperability Security and Privacy

Information Systems  
Software Engineering  
Economics

**Market Entry**

Medical aid Business partners Hospitals Clinics

**Chicken-or-egg dilemma**

Follow-the-rabbit Piggy-back  
Seeding Marquee Single-side  
Evangelism Big-bang Micro-market

**Control Mechanisms**

**Formal Control**  
Design rules and standards  
Documentation Penalties  
Monitoring & evaluation  
Content regulation  
Review processes  
Development aids

**Informal Control**  
Common values  
Shared beliefs  
Community building  
Methods of guiding behaviours

**Openness Dimensions**

Boundary resources  
Governance  
Research and development  
Platform management  
Marketing and sales  
Consulting and support

**Ecosystem Health Watch**

Platform Software External Environment Platform Owner Firm Software Projects

Health and Technology Education Available Devices (Mobile) Data: Availability Cost Traffic Adoption Sustainability

Management  
Economics  
Ecosystem Governance

**Platform Evolution and Maturity**

Goals  
Priorities

**Evolve?**

Platform ecosystem  
Platform owner firm Platform projects

- Screen competing ecosystems and relevant industries
- Add additional ecosystem partners
- Identify bottlenecks
- Develop and apply maturity model

**Evaluate Success of Balancing Factors**

- Modularity
- Openness
- Entry barriers

**Evaluate Platform**

- Resourcing
- Securing

**Incorporate Feedback**

Stumbling blocks Feedback

**External Environment**

- New laws, standards or protocols
- Emerging technologies

Innovation  
Technology Management

Evolve one or more of the parts
